# Supplementary material for: Design, synthesis and computational studies of new azaheterocyclic coumarin derivatives as anti-Mycobacterium tuberculosis agents targeting enoyl acyl carrier protein reductase (InhA)
Source: Royal Society of Chemistry journal article supplement (doi:10.1039/d4ra02746a), 2024-01-01
Supplement: d4ra02746a1.pdf [file d4ra02746a1.pdf]

## Supplementary Information

### Design, synthesis and computational studies of new azaheterocyclic coumarin derivatives as anti-*Mycobacterium tuberculosis* agents targeting enoyl acyl carrier protein reductase (InhA)

Rasha Z. Batran, Ahmed Sabt, Jaroslaw Dziadek, Asmaa F. Kassem

- Table S1. Antimycobacterial activity of tested compounds
- Table S2. Cytotoxicity of the selected compound 4c to human macrophages
- Table S3. Statistical analysis of the antibacterial effect of the selected compound 4c against tubercle bacilli located inside human macrophages.
- <sup>1</sup>HNMR and <sup>13</sup>CNMR of the new compounds.

**Table S1. Antimycobacterial activity of tested compounds.**

| compounds | Mtb - MIC<br>[µg/mL] | M.abscessus -<br>MIC [µg/mL] | IC50=L929<br>[µg/mL] | bactericidal<br>concentration | IC50/MIC -<br>Mtb |
|-----------|----------------------|------------------------------|----------------------|-------------------------------|-------------------|
| 3         | 62.5                 | >125                         | ND                   | ND                            | ND                |
| 4a        | 62.5                 | >125                         | ND                   | ND                            | ND                |
| 4b        | 15                   | >125                         | 31.25                | ND                            | 2                 |
| 4c        | 15                   | >125                         | 125                  | 75                            | 8                 |
| 8a        | >125                 | >125                         | ND                   | ND                            | ND                |
| 8b        | 62.5                 | >125                         | ND                   | ND                            | ND                |
| 8c        | 62.5                 | >125                         | ND                   | ND                            | ND                |
| 9a        | 31.25                | >125                         | 62.5                 | ND                            | 2                 |
| 9b        | 62.5                 | >125                         | ND                   | ND                            | ND                |
| 9c        | 62.5                 | >125                         | ND                   | ND                            | ND                |
| 10        | >125                 | >125                         | ND                   | ND                            | ND                |
| 11        | 62.5                 | >125                         | ND                   | ND                            | ND                |
| 12        | 125                  | >125                         | ND                   | ND                            | ND                |
| 13        | 62.5                 | >125                         | ND                   | ND                            | ND                |
| 14        | 62.5                 | >125                         | ND                   | ND                            | ND                |
| 15        | >125                 | >125                         | ND                   | ND                            | ND                |
| 16        | >125                 | >125                         | ND                   | ND                            | ND                |
| 17        | >125                 | >125                         | ND                   | ND                            | ND                |

ND – not determined, Mtb – *M. tuberculosis*, L929 – mouse fibroblasts cell line,

**Table S2. Cytotoxicity of the selected compound 4c to human macrophages**

| concentration        | 2xMI<br>C      | 4xMI<br>C |
|----------------------|----------------|-----------|
| compounds:           | % cytotoxicity |           |
| 4c                   | 32             | 34        |
| <b>media-control</b> |                |           |
| IMDM                 | 0              |           |
| DMSO/2M              | 2              |           |
| DMSO/4M              | 11             |           |

IMDM - media, DMSO/2M – xx, DMSO/4M - xx

**Table S3. Statistical analysis of the antibacterial effect of the selected compound 4c against tubercle bacilli located inside human macrophages.**

| Dunnett's multiple<br>comparisons test | Mean<br>Diff, | 95,00% CI of<br>diff, | Below<br>threshold? | Summary | Adjusted P<br>Value |
|----------------------------------------|---------------|-----------------------|---------------------|---------|---------------------|
| control vs. 4c                         | 70333         | 18988 to<br>121678    | Yes                 | **      | 0,0041              |

Ordinary one-way ANOVA test was applied for all comparisons.

- $^1\text{H}$ NMR and  $^{13}\text{C}$ NMR of the new compounds.**

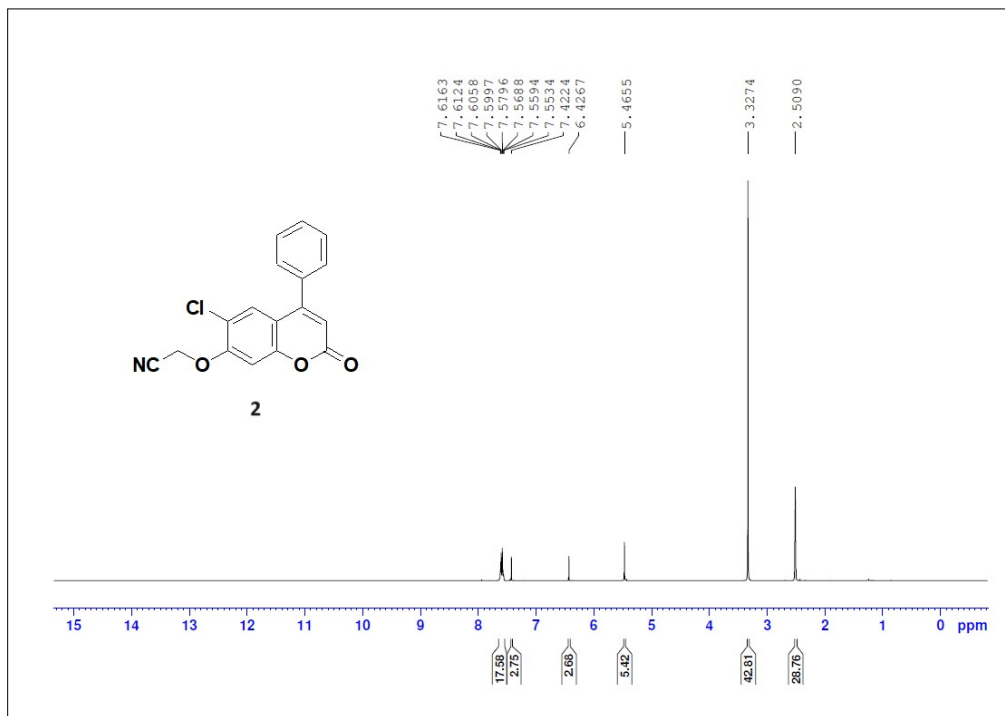

**$^1\text{H}$ NMR of compound 2**

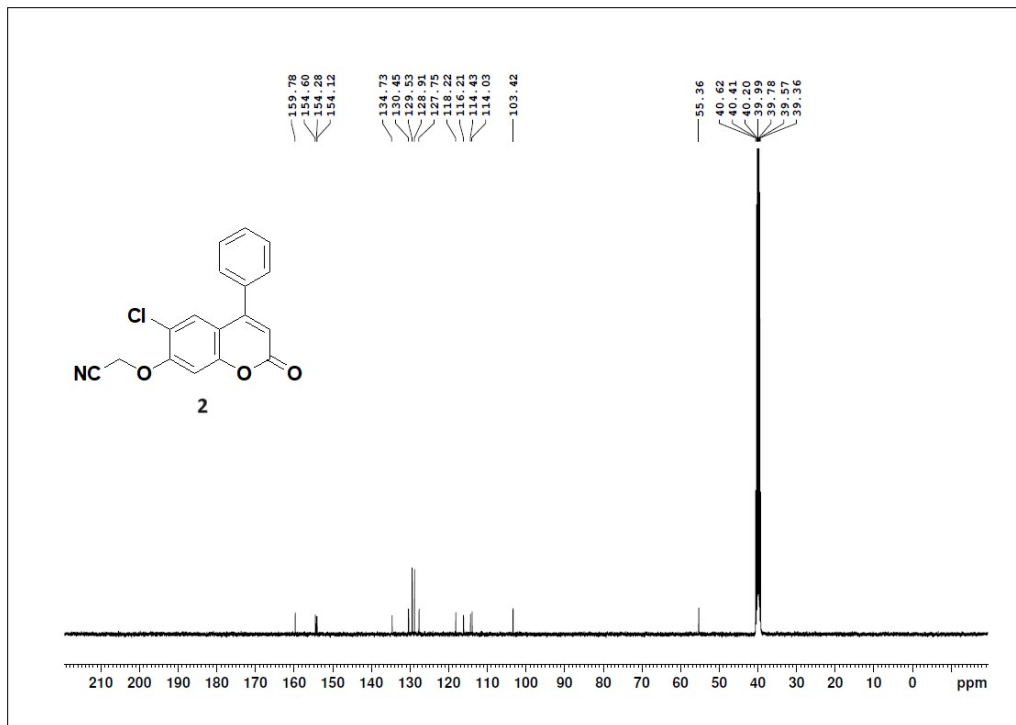

**$^{13}\text{C}$ NMR of compound 2**

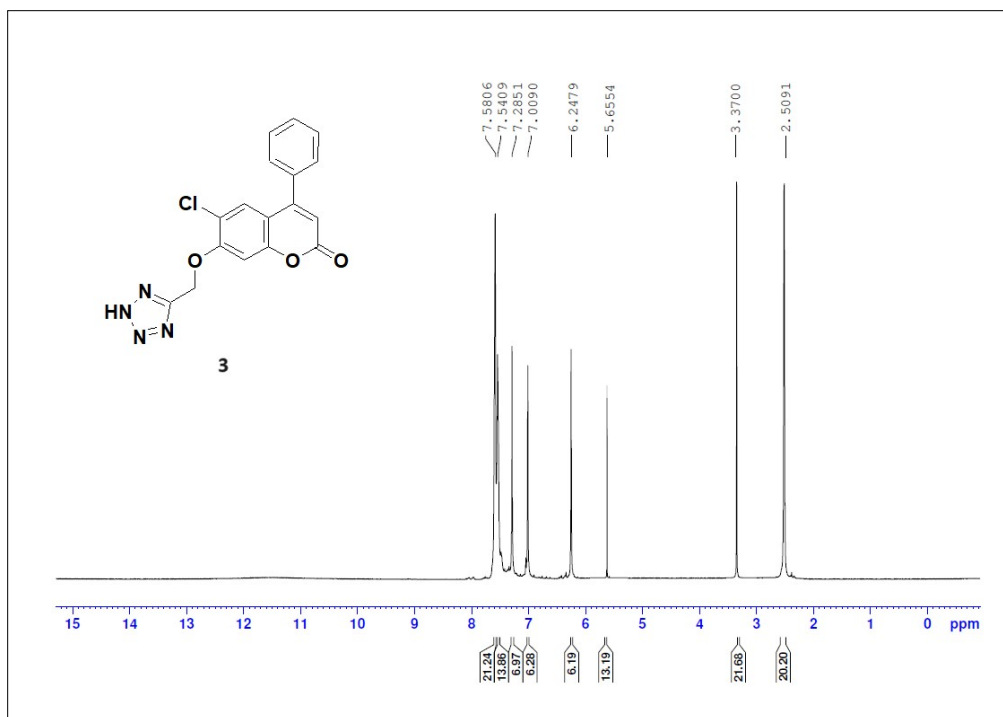

**<sup>1</sup>H NMR of compound 3**

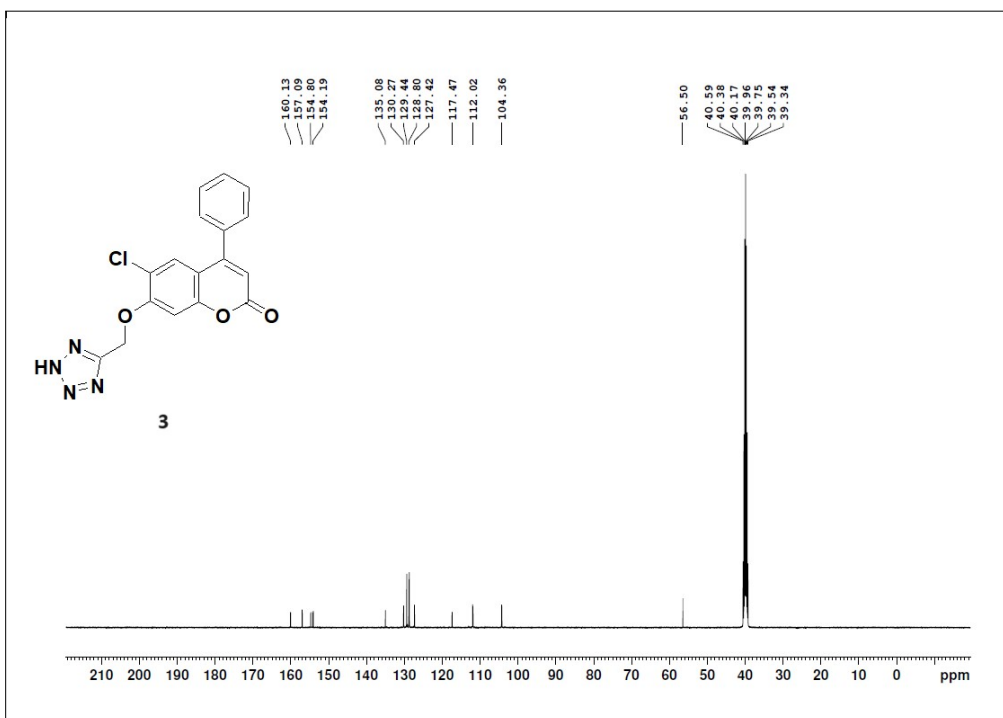

**<sup>13</sup>C NMR of compound 3**

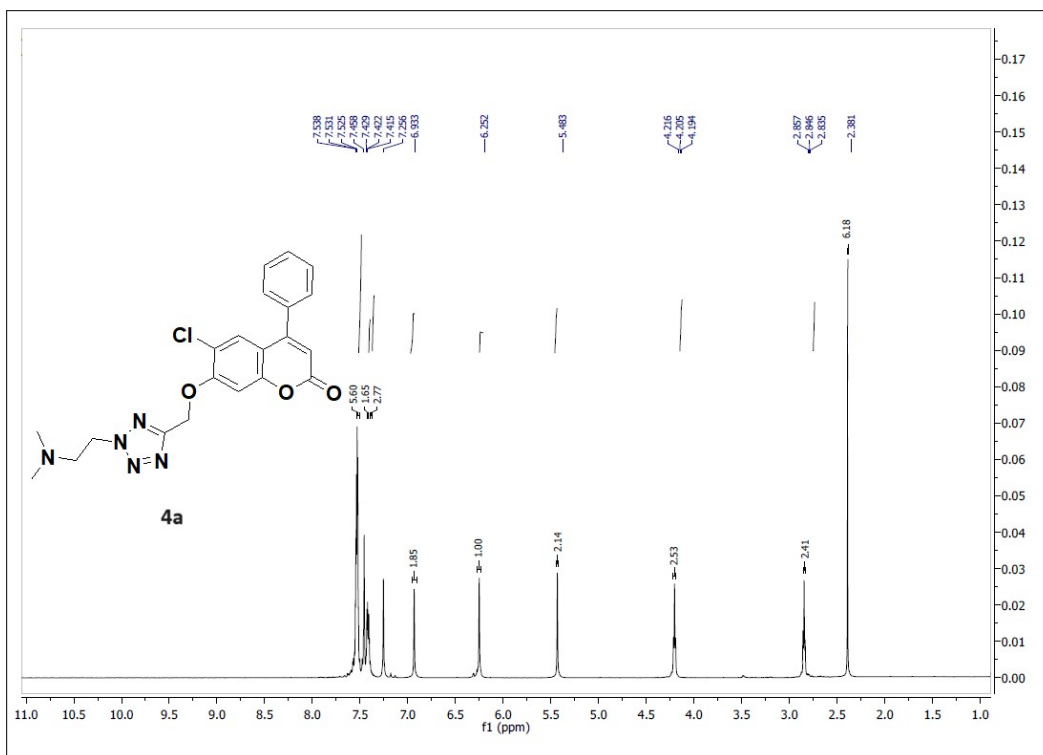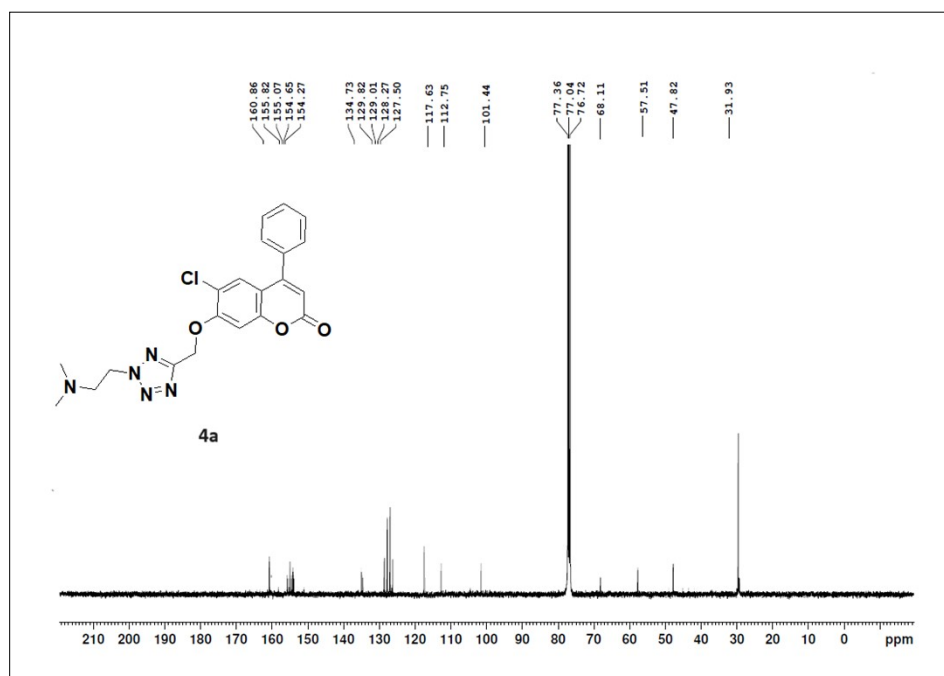

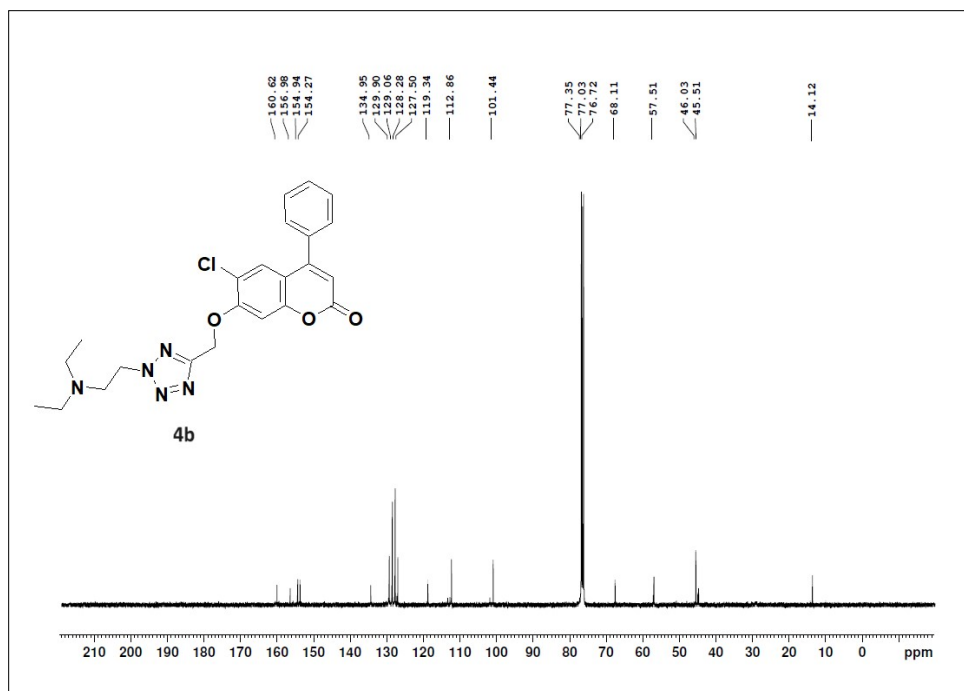

<sup>1</sup>H NMR of compound 4b

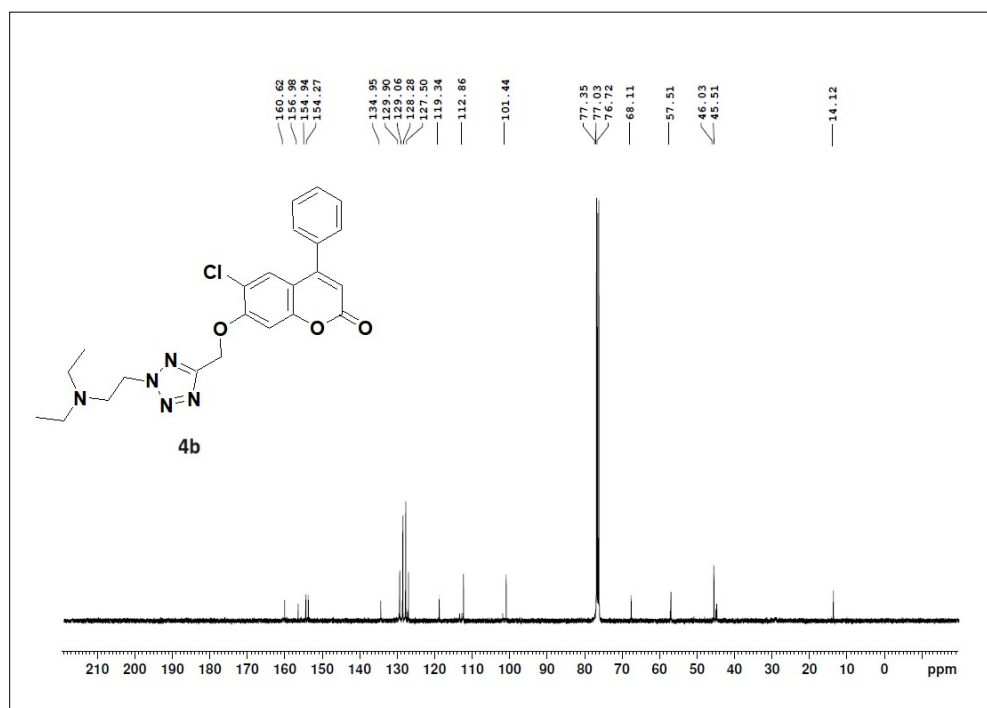

<sup>13</sup>C NMR of compound 4b

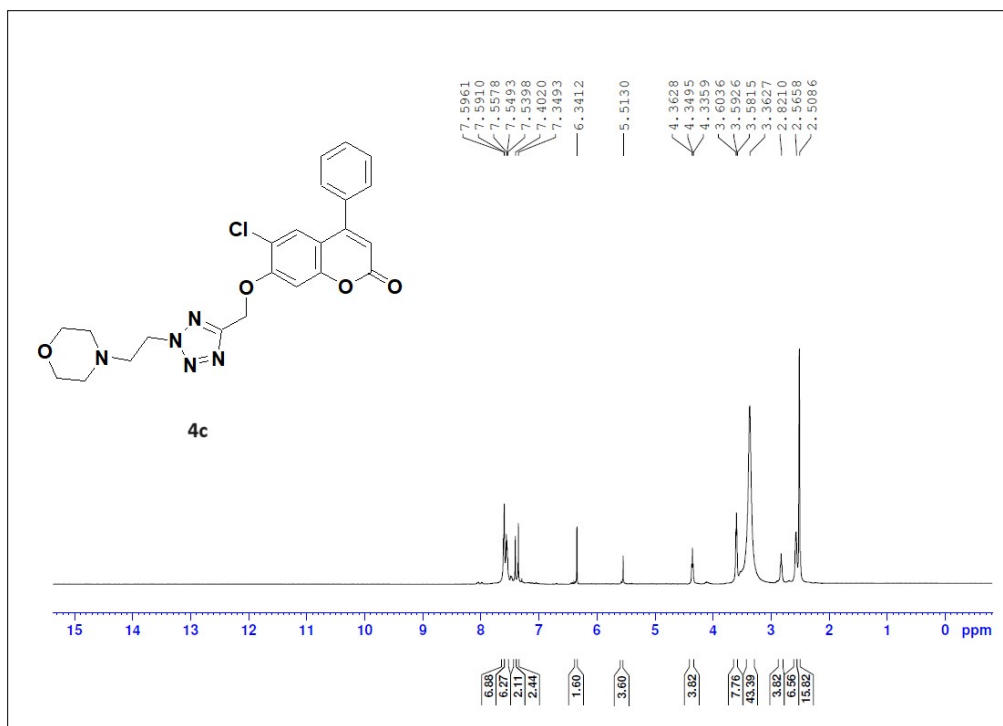

**<sup>1</sup>H NMR of compound 4c**

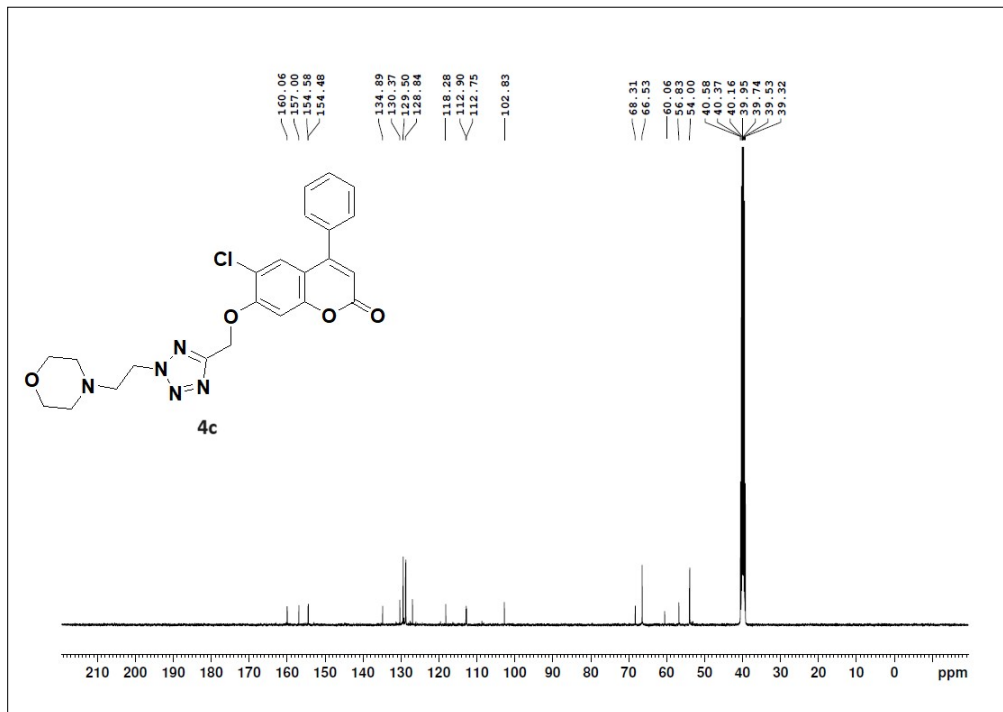

**<sup>13</sup>C NMR of compound 4c**

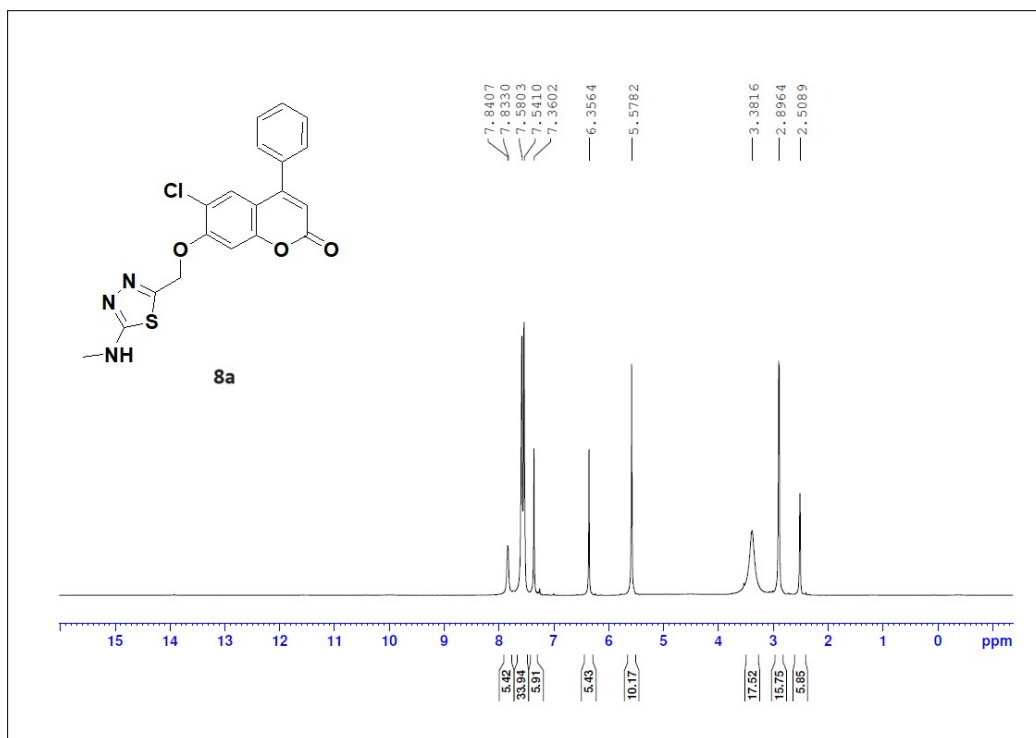

**<sup>1</sup>H NMR of compound 8a**

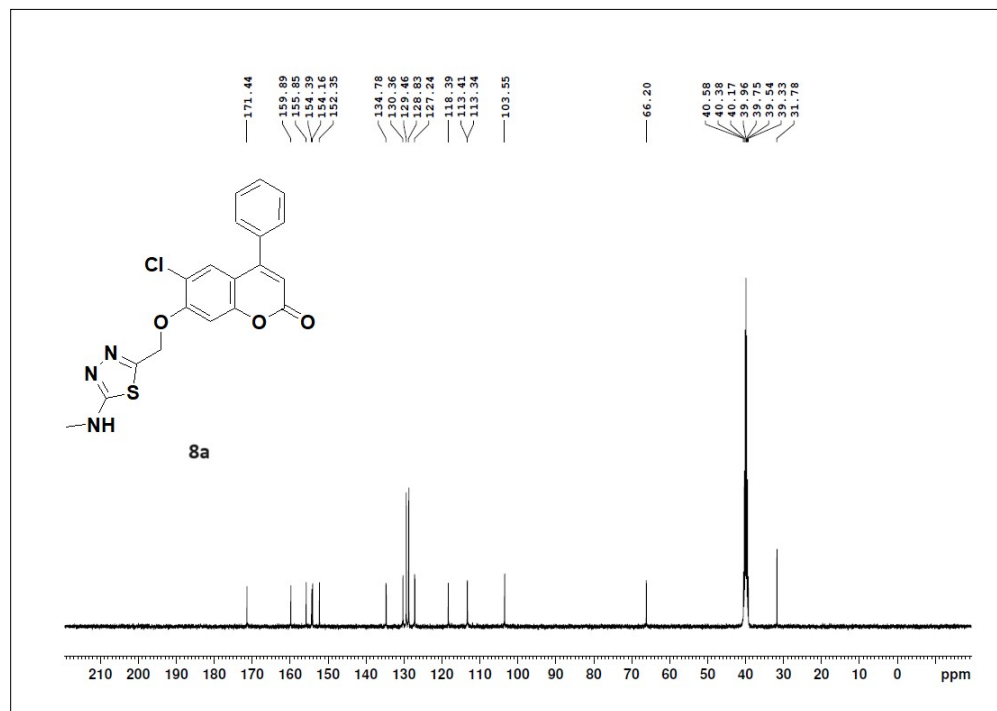

**<sup>13</sup>C NMR of compound 8a**



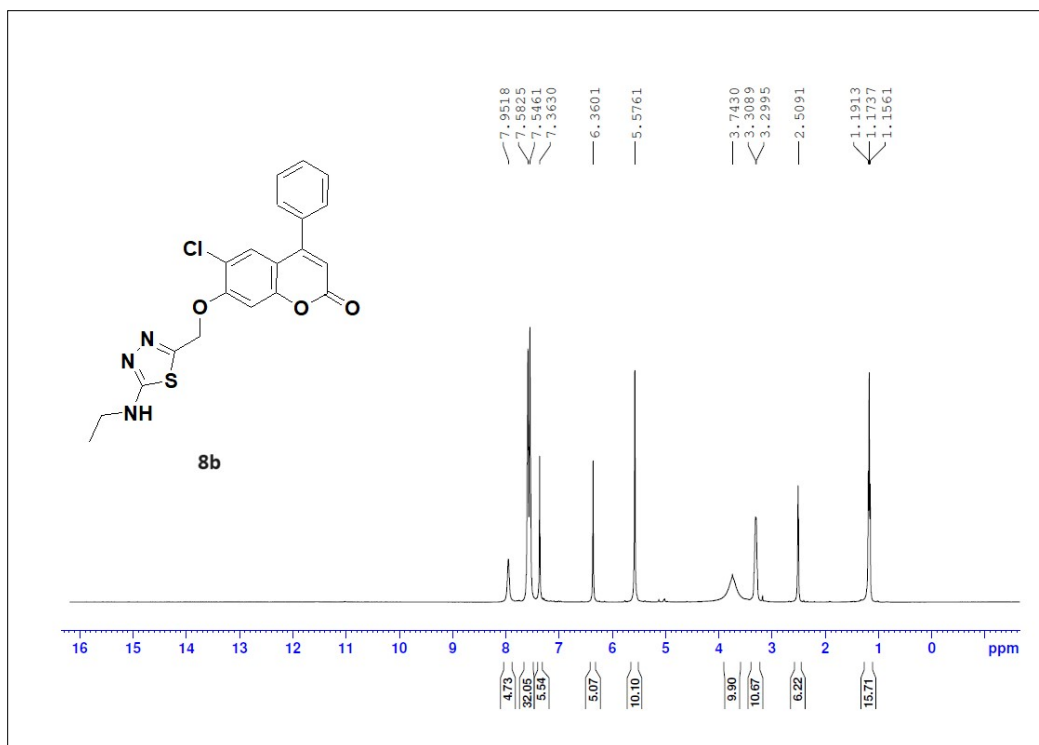

**<sup>1</sup>H NMR of compound 8b**

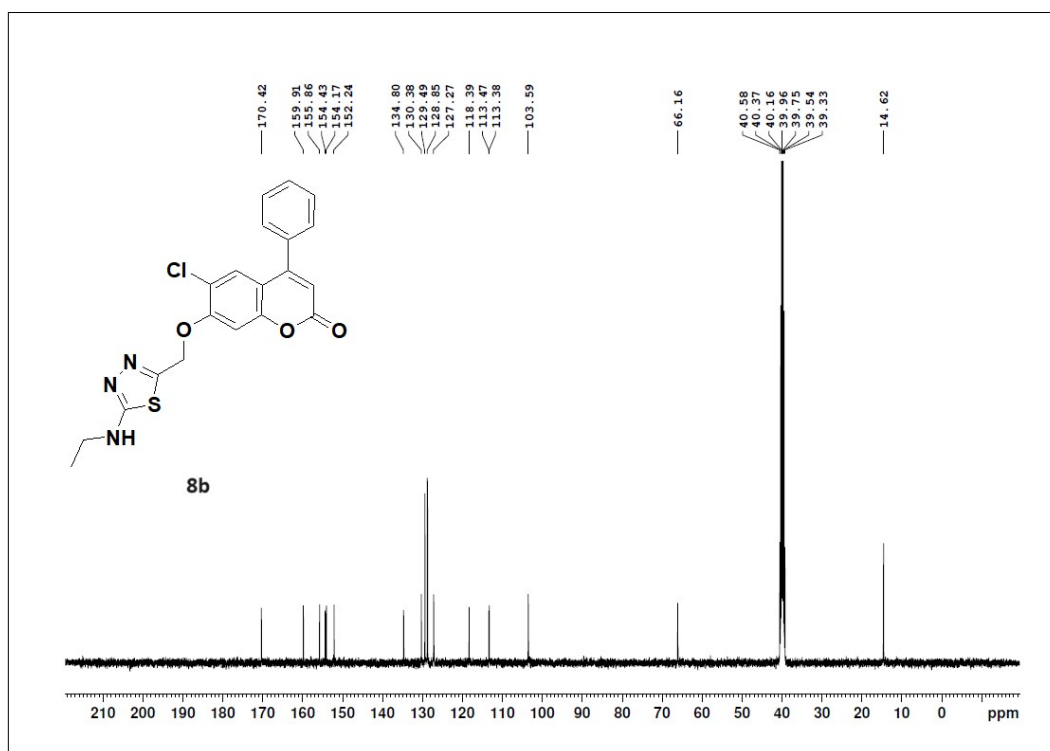

**<sup>13</sup>C NMR of compound 8b**

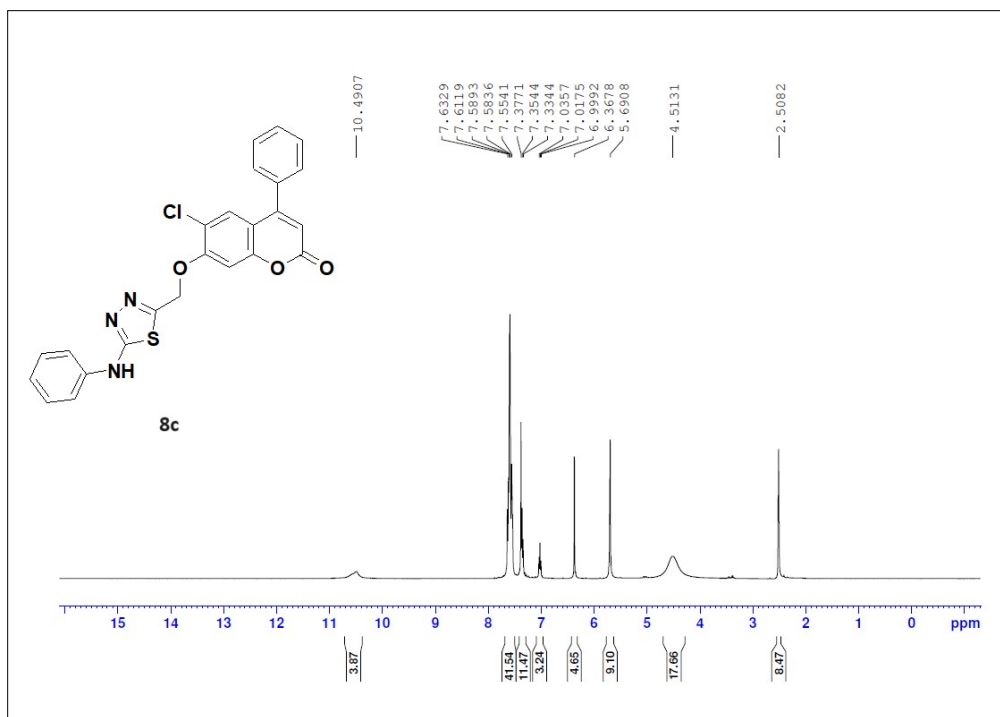

**<sup>1</sup>H NMR of compound 8c**

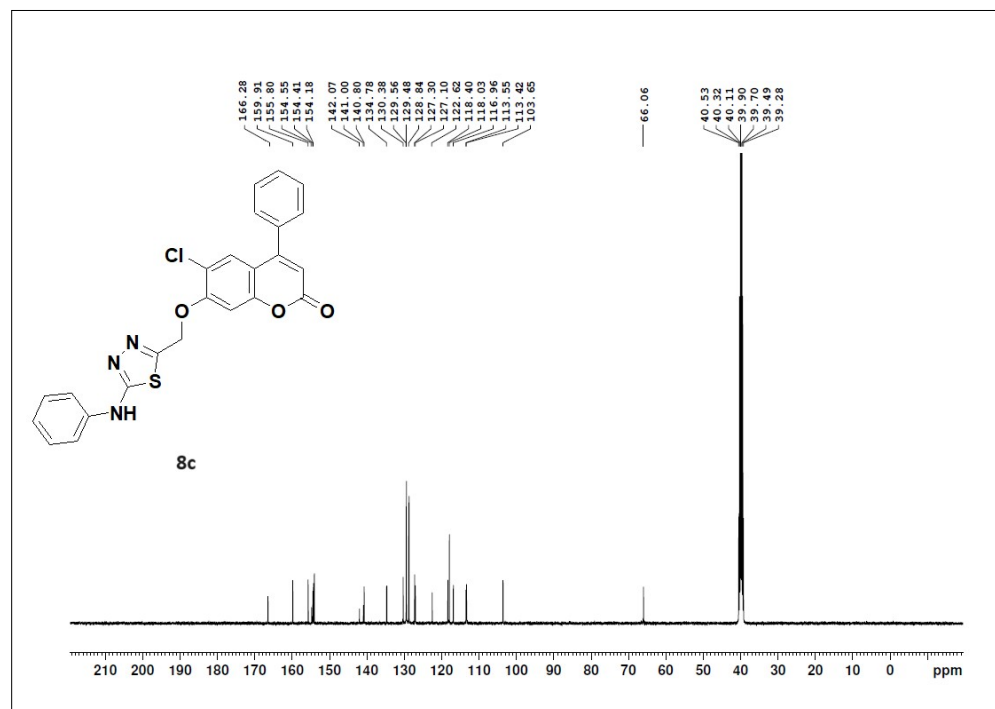

**<sup>13</sup>C NMR of compound 8c**

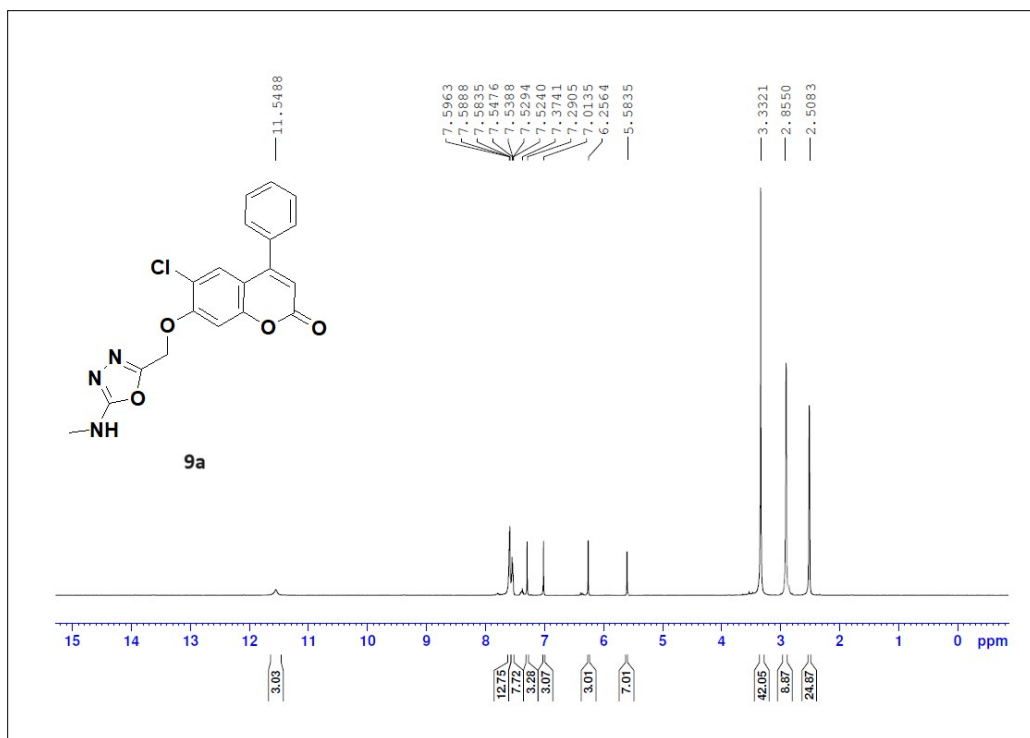

**<sup>1</sup>H NMR of compound 9a**

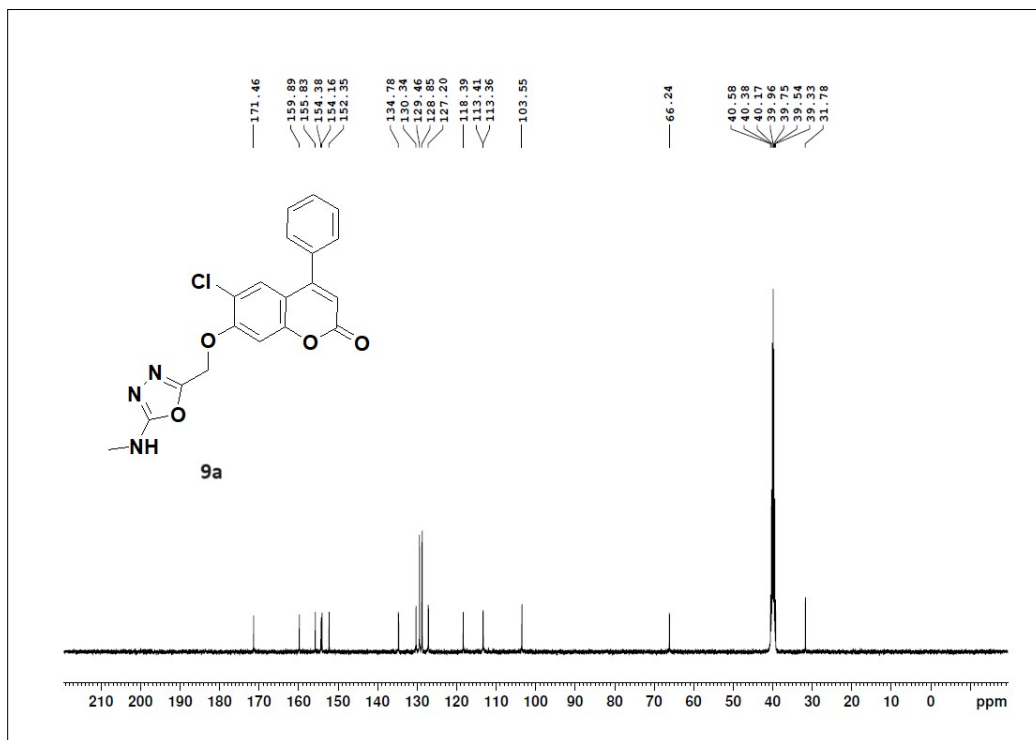

**<sup>13</sup>C NMR of compound 9a**

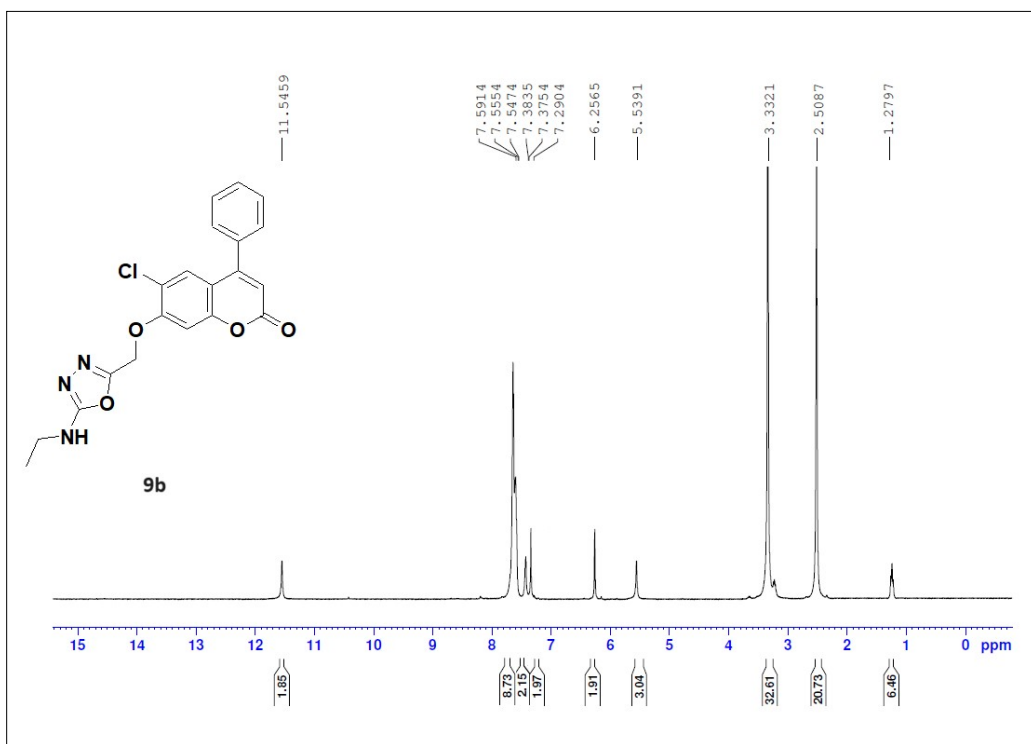

**<sup>1</sup>H NMR of compound 9b**

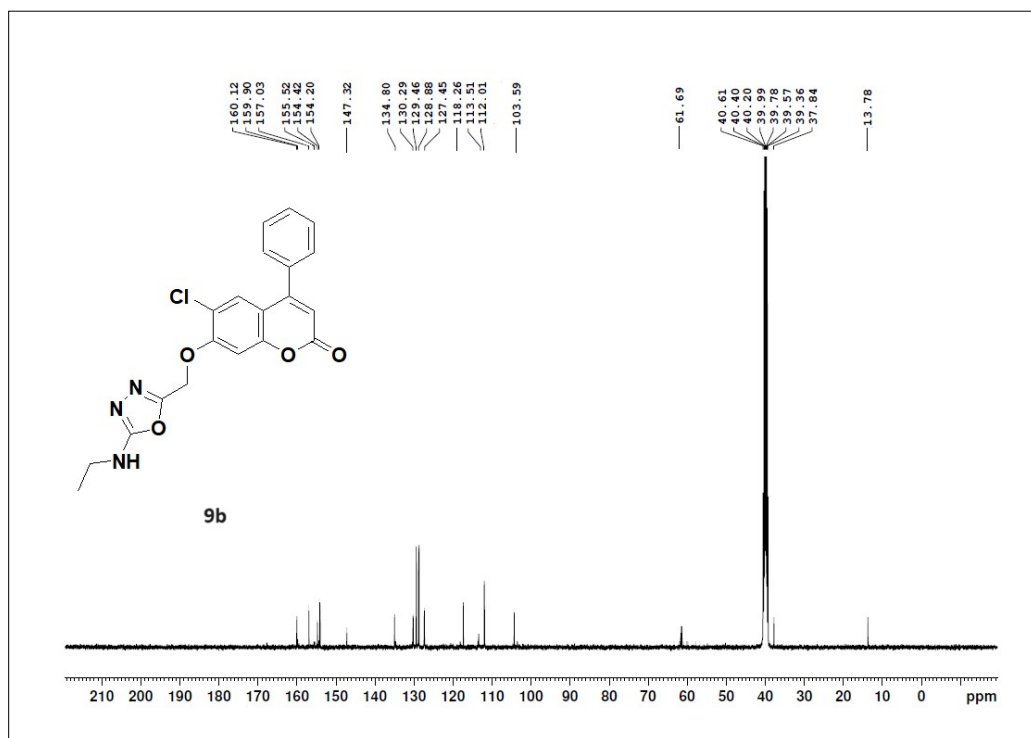

**<sup>13</sup>C NMR of compound 9b**

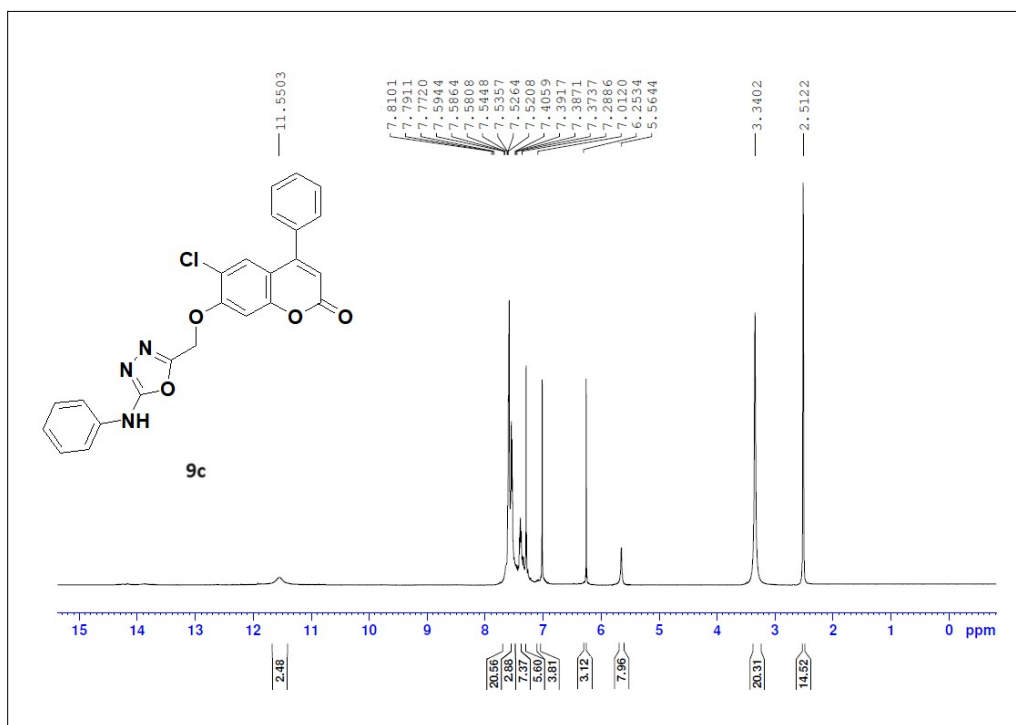

**<sup>1</sup>H NMR of compound 9c**

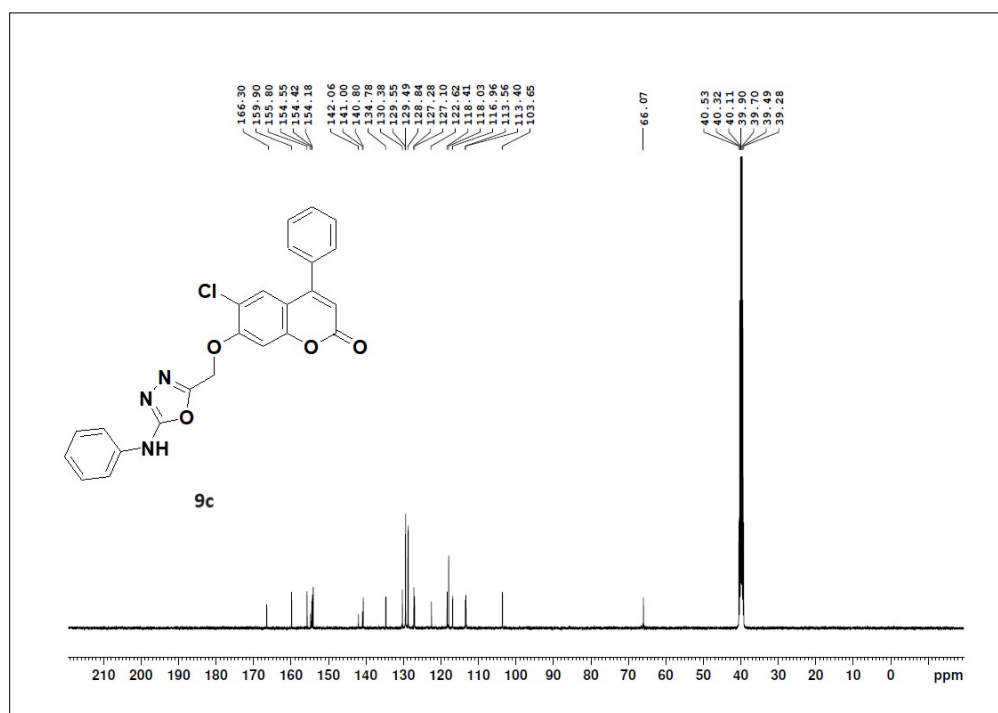

**<sup>13</sup>C NMR of compound 9c**

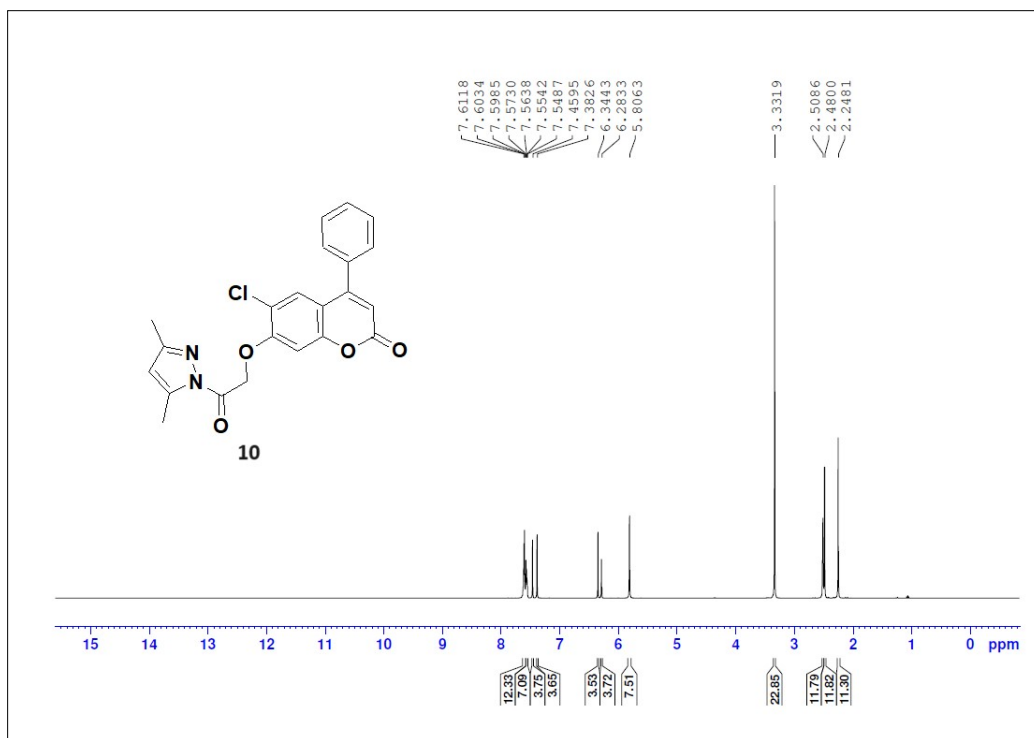

**<sup>1</sup>H NMR of compound 10**

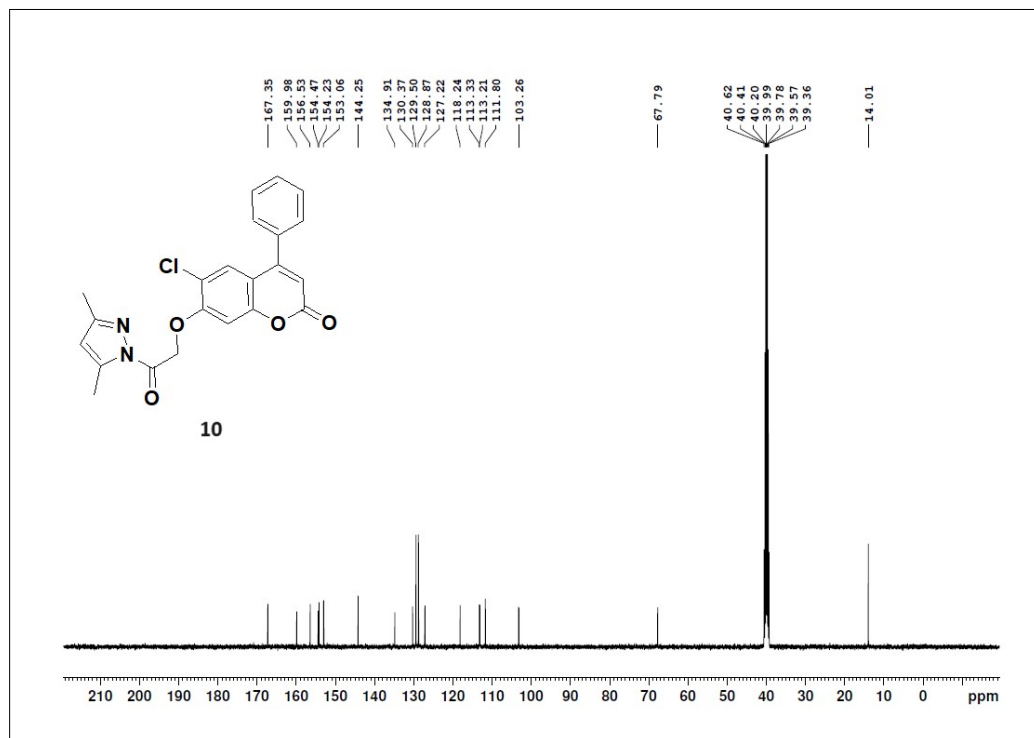

**<sup>13</sup>C NMR of compound 10**

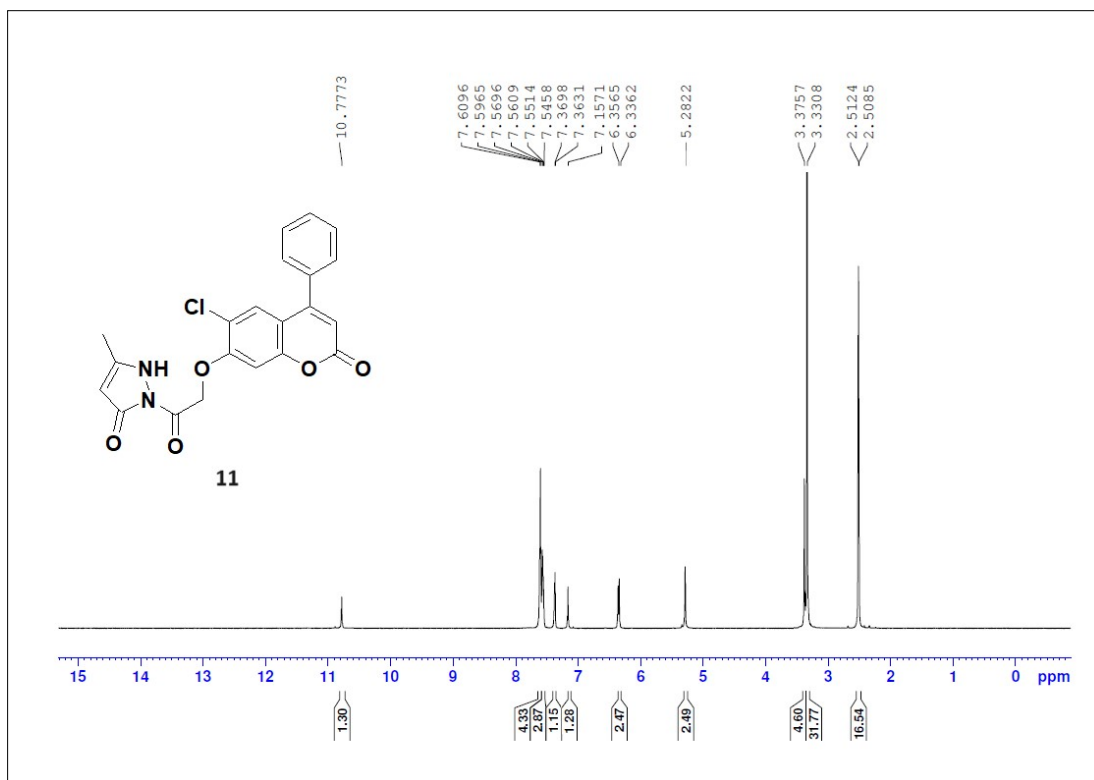

**<sup>1</sup>H NMR of compound 11**

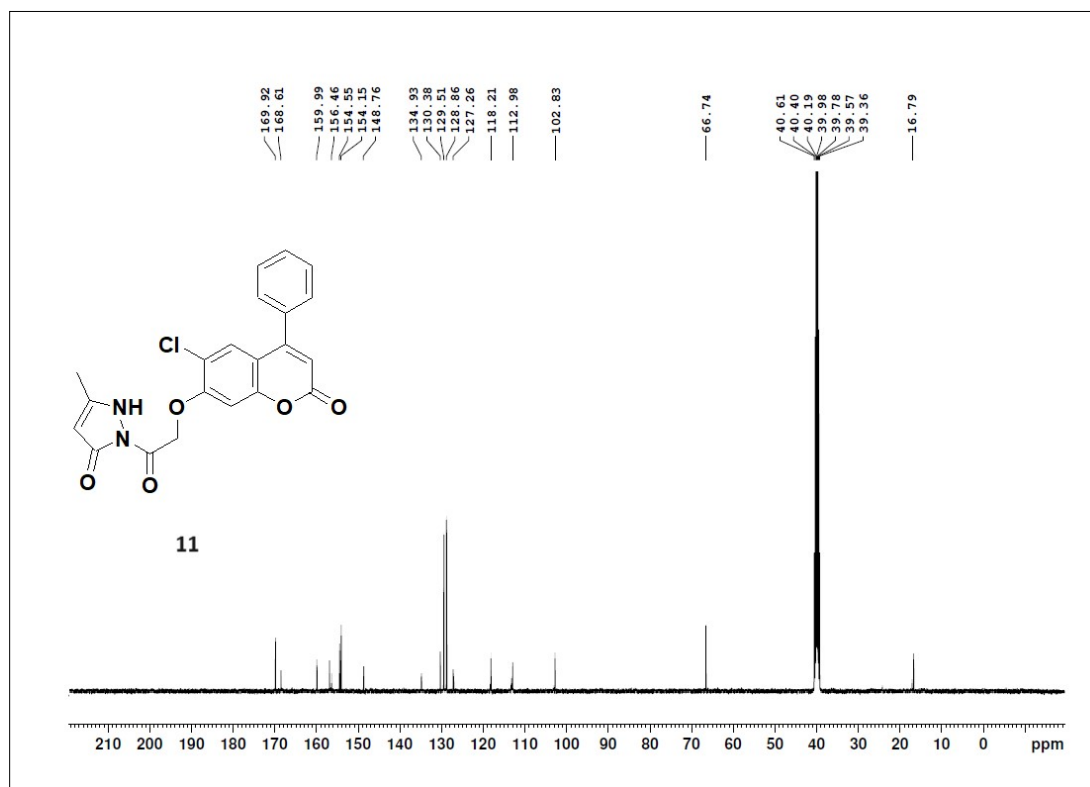

**<sup>13</sup>C NMR of compound 11**

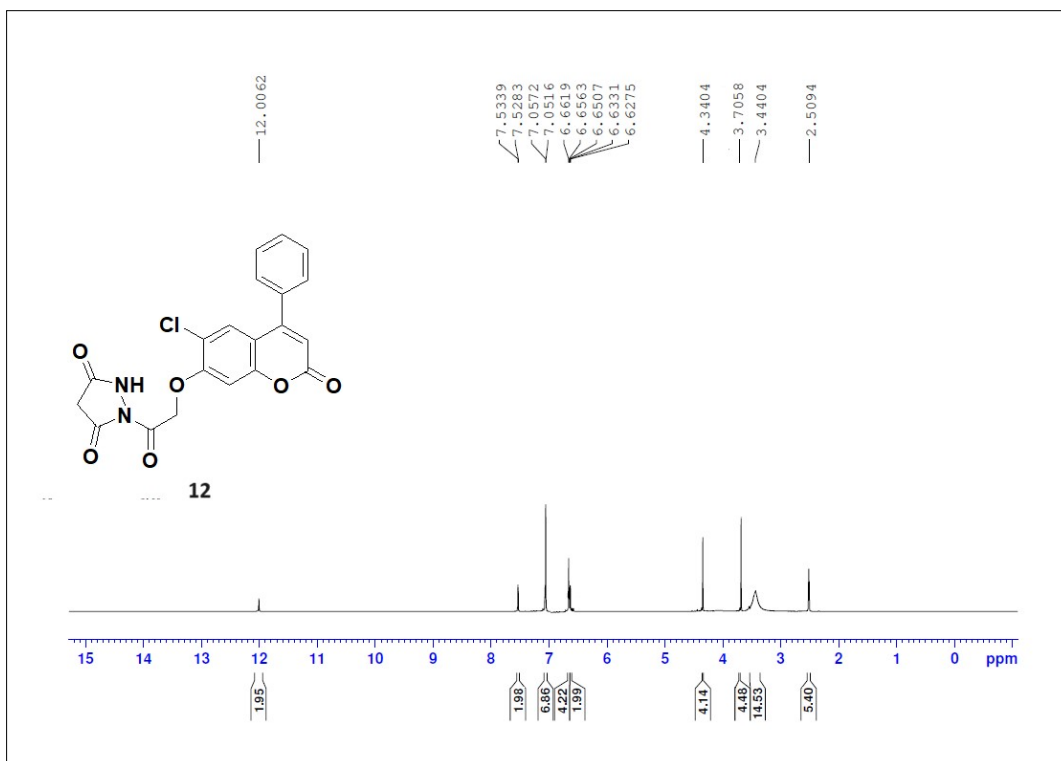

**<sup>1</sup>H NMR of compound 12**

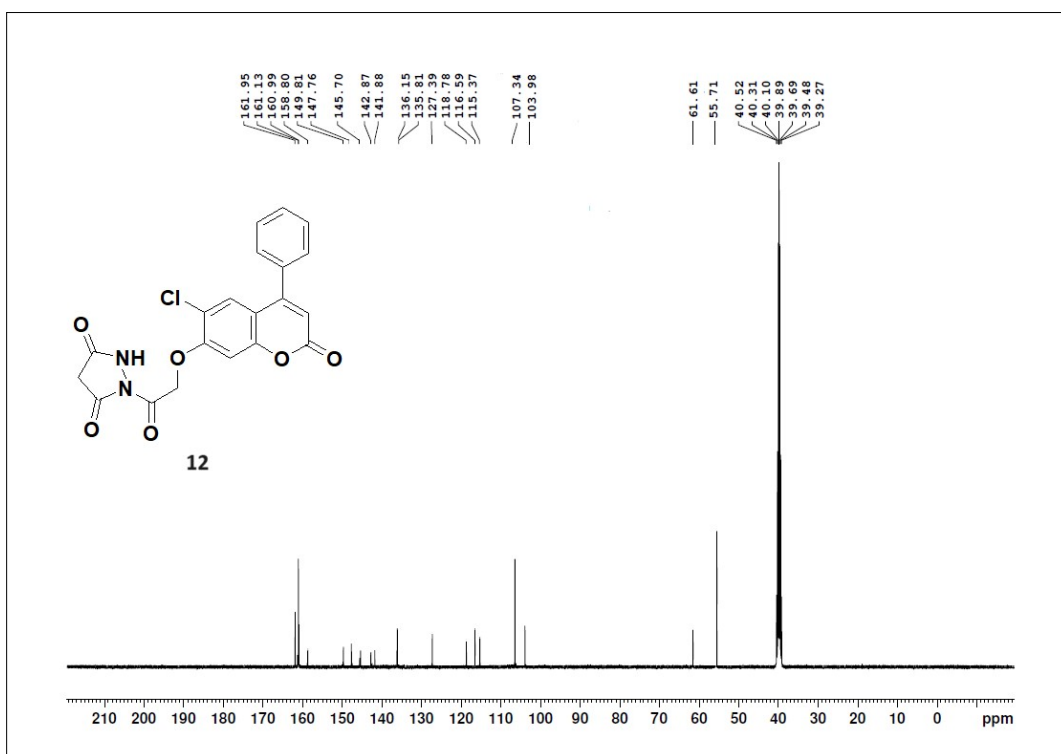

**<sup>13</sup>C NMR of compound 12**



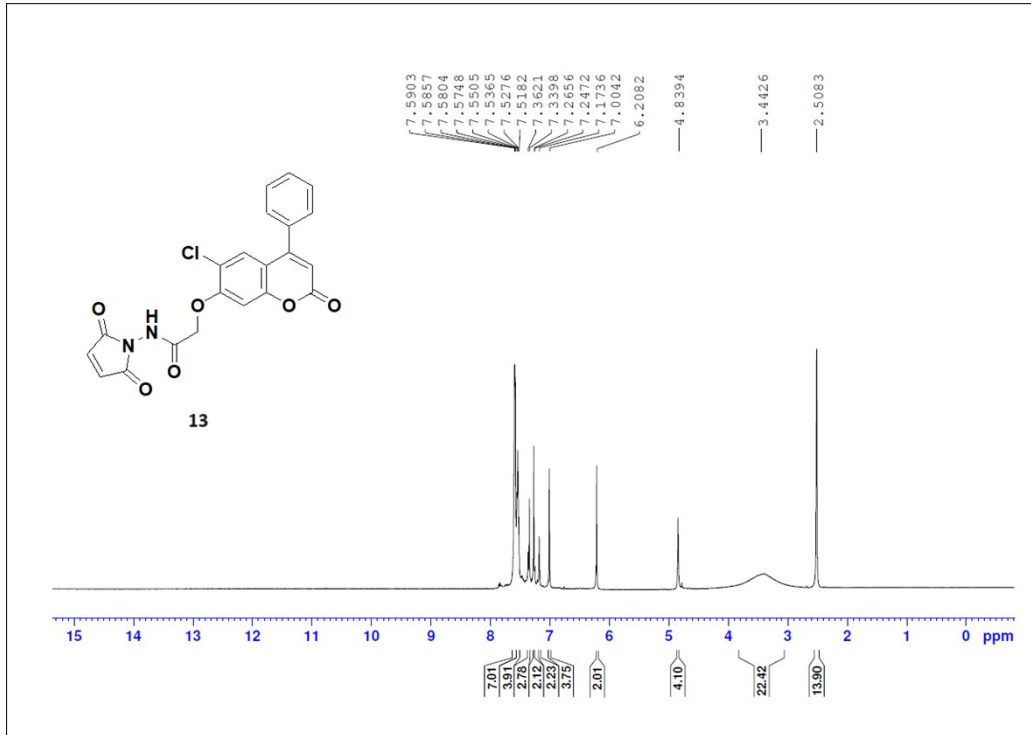

**<sup>1</sup>H NMR of compound 13**

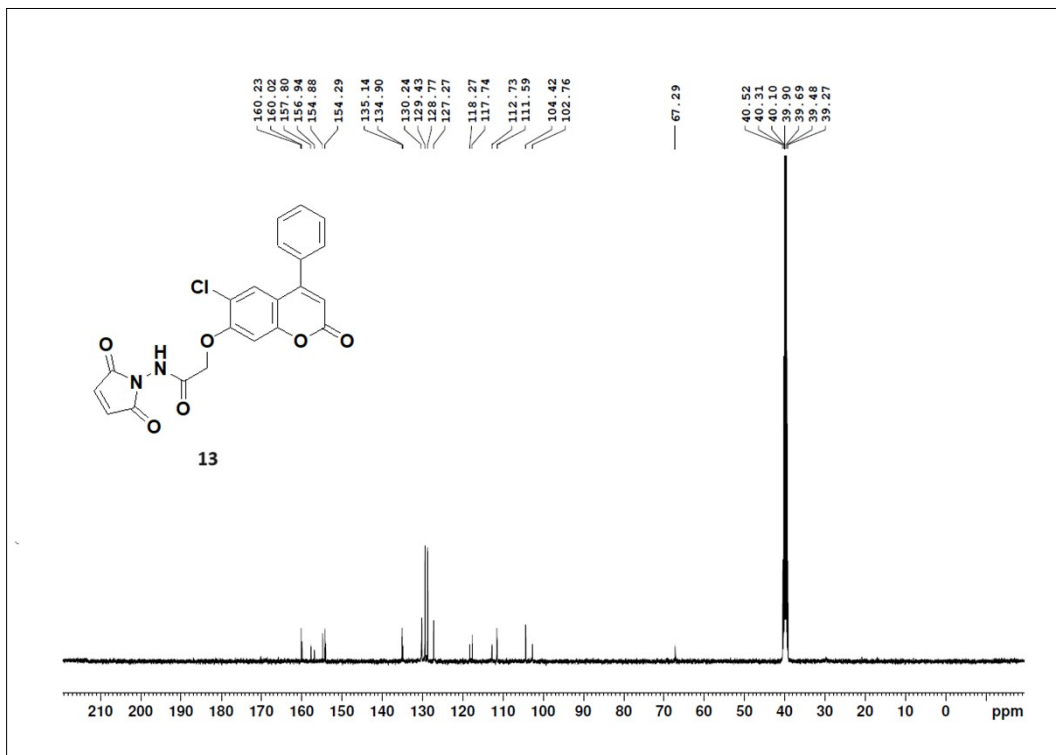

**<sup>13</sup>C NMR of compound 13**

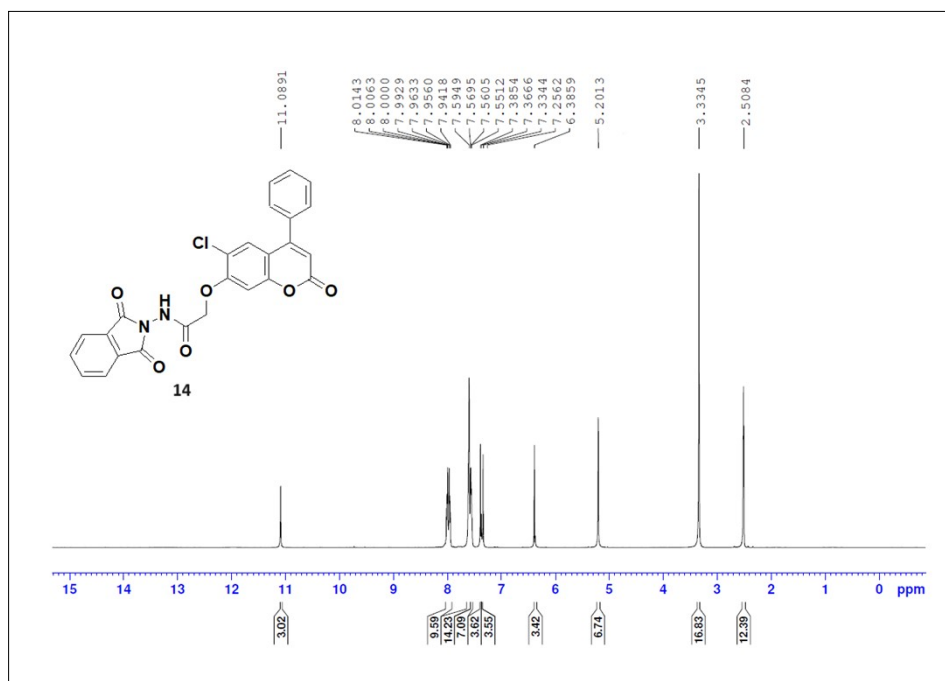

**<sup>1</sup>H NMR of compound 14**

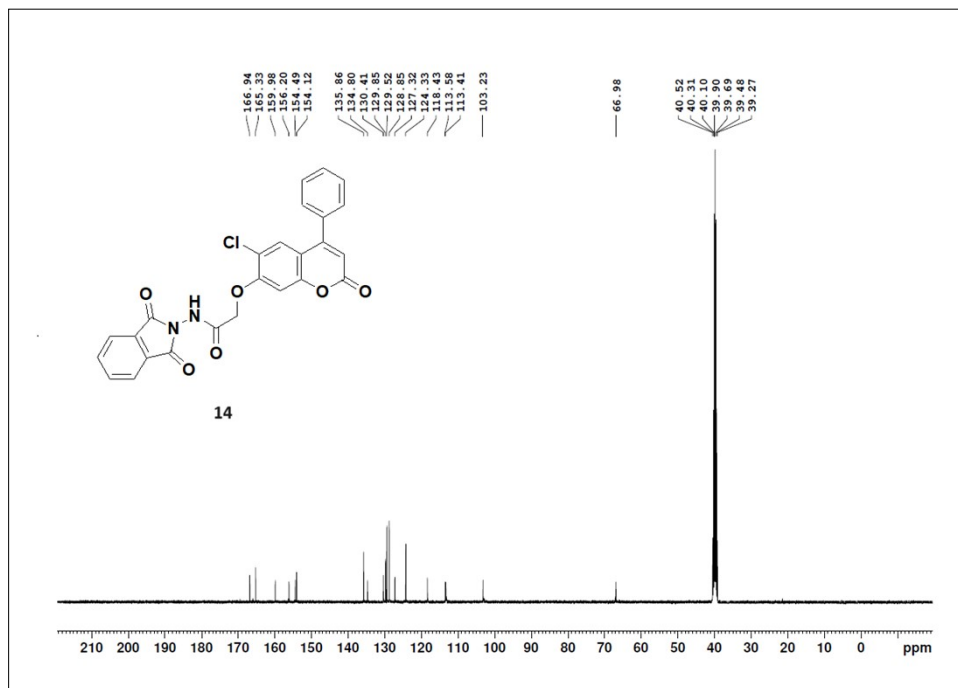

**<sup>13</sup>C NMR of compound 14**

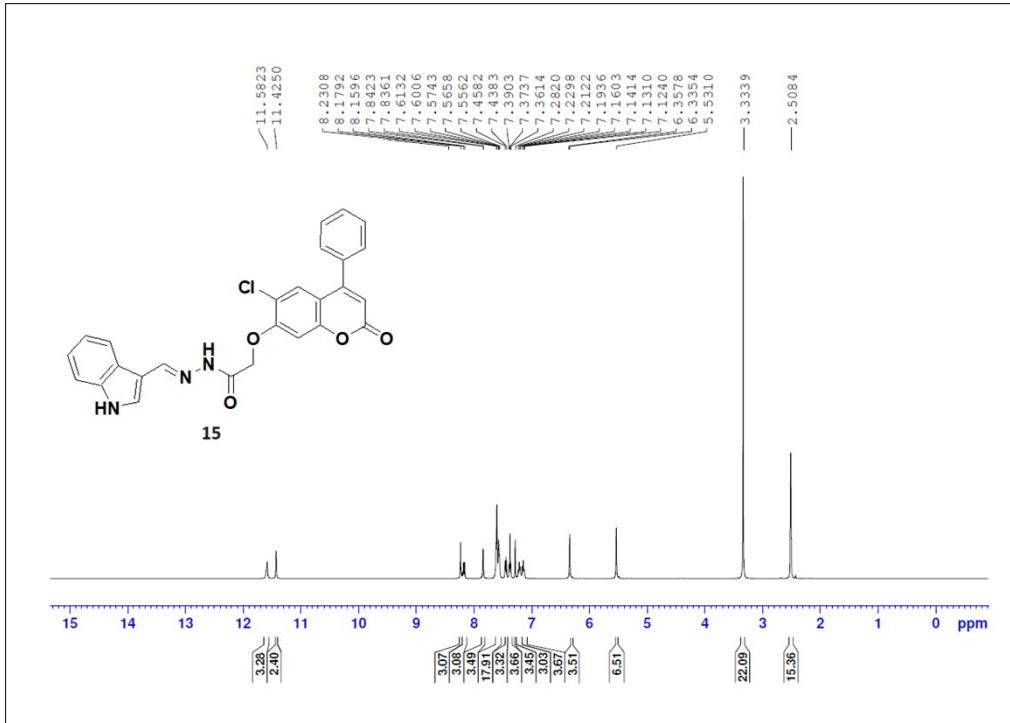

**<sup>1</sup>H NMR of compound 15**

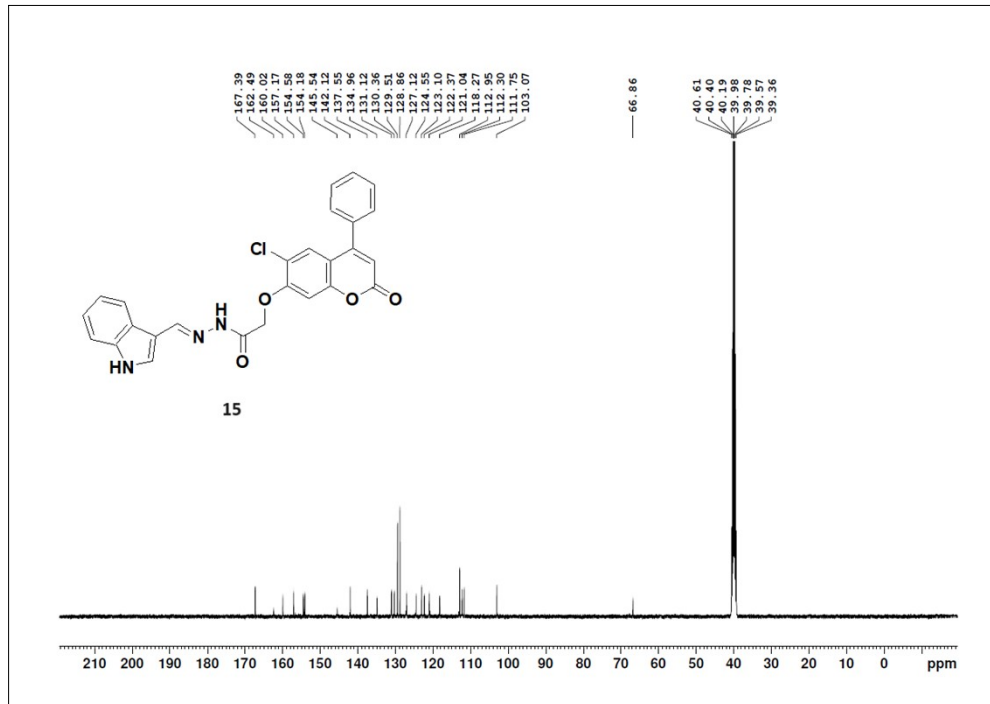

**<sup>13</sup>C NMR of compound 15**

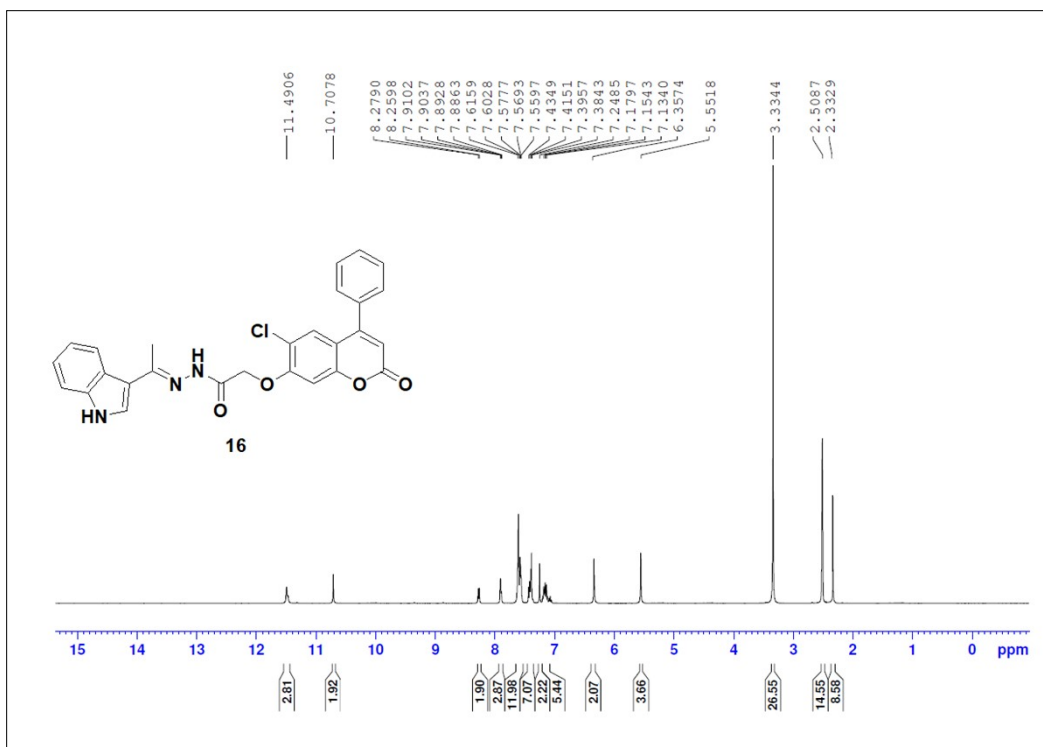

**<sup>1</sup>H NMR of compound 16**

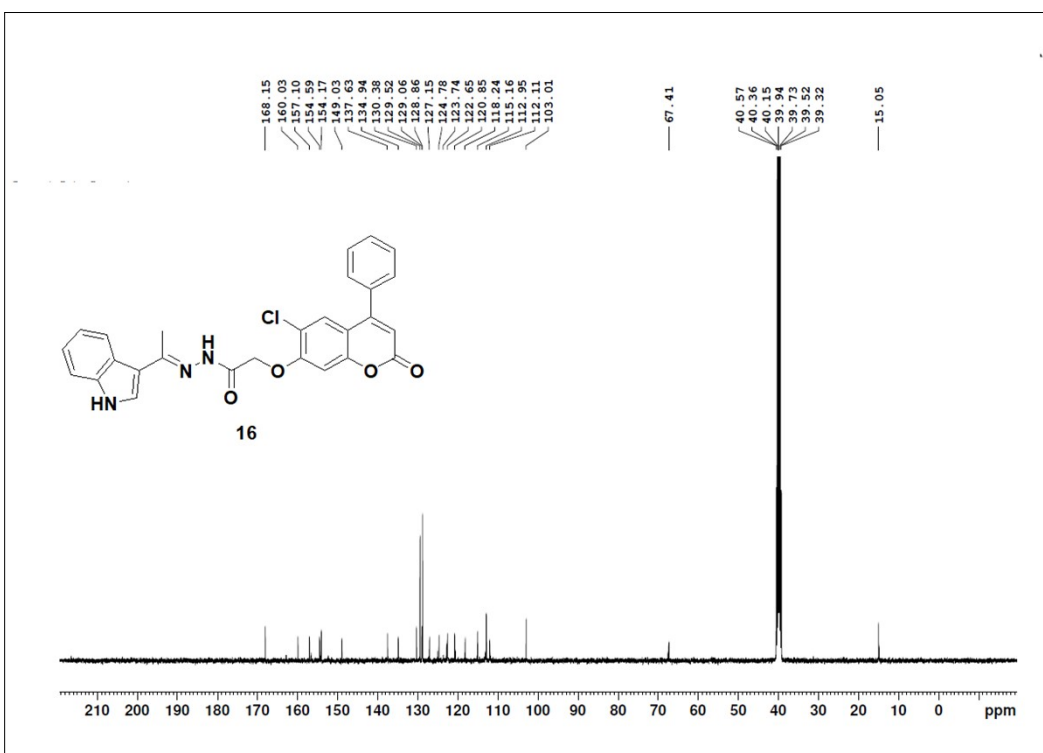

**<sup>13</sup>C NMR of compound 16**

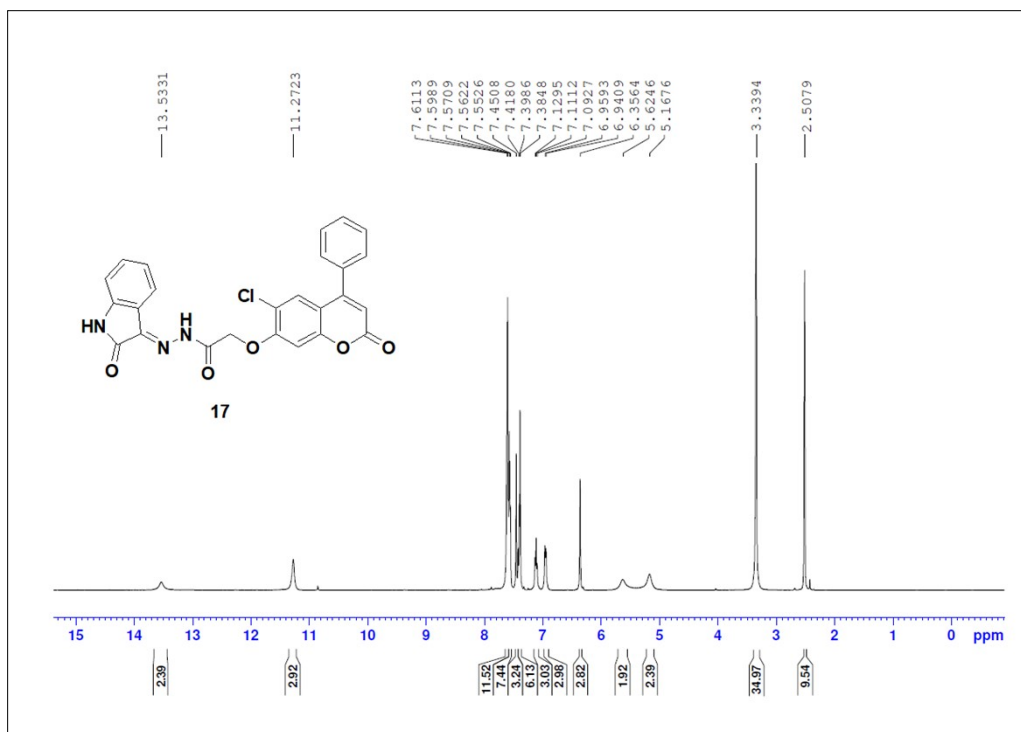

**<sup>1</sup>H NMR of compound 17**

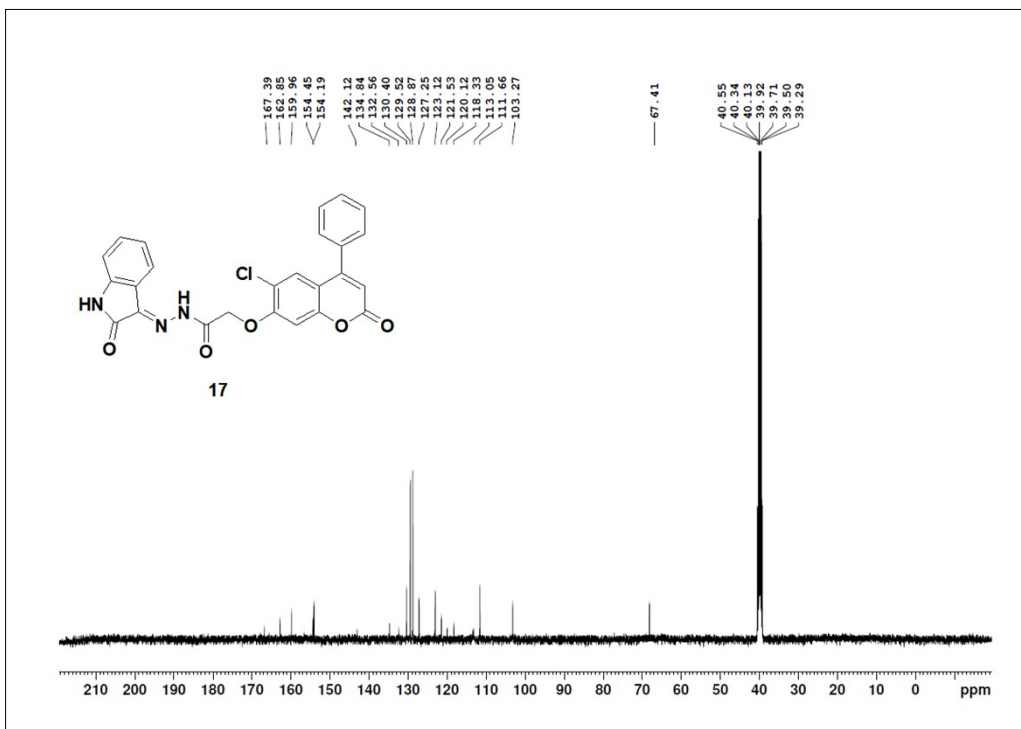

**<sup>13</sup>C NMR of compound 17**
